# Supplementary material for: Enhancing Third-Order Nonlinear Optical Property by Regulating Interaction between Zr4(embonate)6 Cage and N, N-Chelated Transition-Metal Cation
Source: MDPI journal article supplement (doi:10.3390/molecules28052301), 2023-03-01
Supplement: s1 [file s1]

## Supplementary Materials

# Enhancing Third-Order Nonlinear Optical Property by Regulating Interaction between $\text{Zr}_4(\text{embonate})_6$ Cage and N, N-Chelated Transition-Metal Cation

Gang Xiang <sup>1,2,†</sup>, Na Li <sup>1,2,†</sup>, Guang-Hui Chen <sup>2</sup>, Qiao-Hong Li <sup>2</sup>, Shu-Mei Chen <sup>1,\*</sup>, Yan-Ping He <sup>2,\*</sup> and Jian Zhang <sup>2</sup>

<sup>1</sup> College of Chemistry, Fuzhou University, Fuzhou 350108, China; xianggang309@163.com (G.X.); lina@fjirsm.ac.cn (N.L.)

<sup>2</sup> State Key Laboratory of Structural Chemistry, Fujian Institute of Research on the Structure of Matter, Chinese Academy of Sciences, Fuzhou 350002, China; chenguanghui@fjirsm.ac.cn (G.-H.C.); lqh2382@fjirsm.ac.cn (Q.-H.L.); zhj@fjirsm.ac.cn (J.Z.)

\* Correspondence: csm@fzu.edu.cn (S.-M.C.); hyp041@163.com (Y.-P.H.)

† These authors contributed equally to this work.

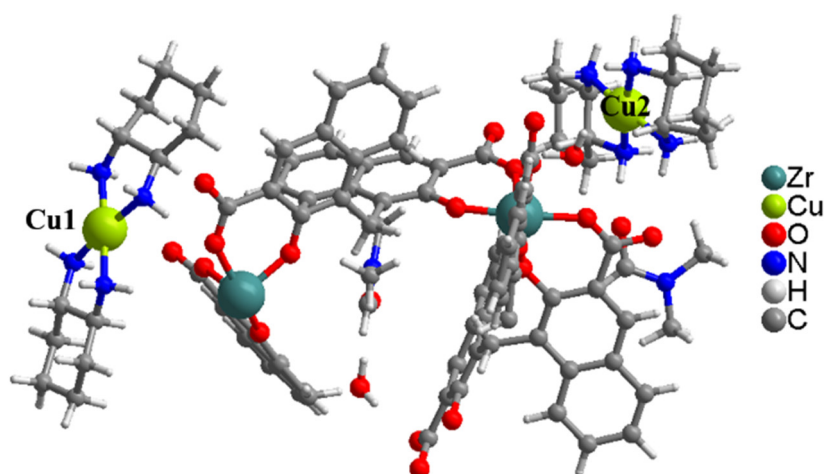

**Figure S1.** The asymmetric unit of **PTC-355**, showing half of  $\text{Zr}_4\text{L}_6$  cage, two  $[\text{Cu}(\text{trans-DCH})_2]^{2+}$  cations, and some solvent molecules. (Other solvents could not be located because of highly disorder).

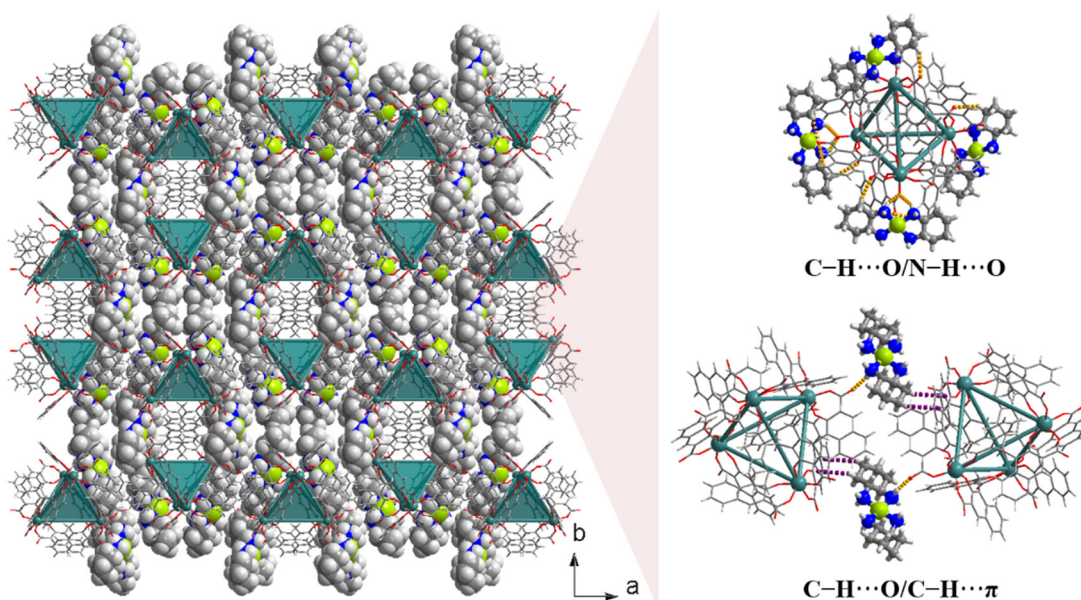

**Figure S2.** The packed structure along the c-axis and the supramolecular interactions in PTC-355.

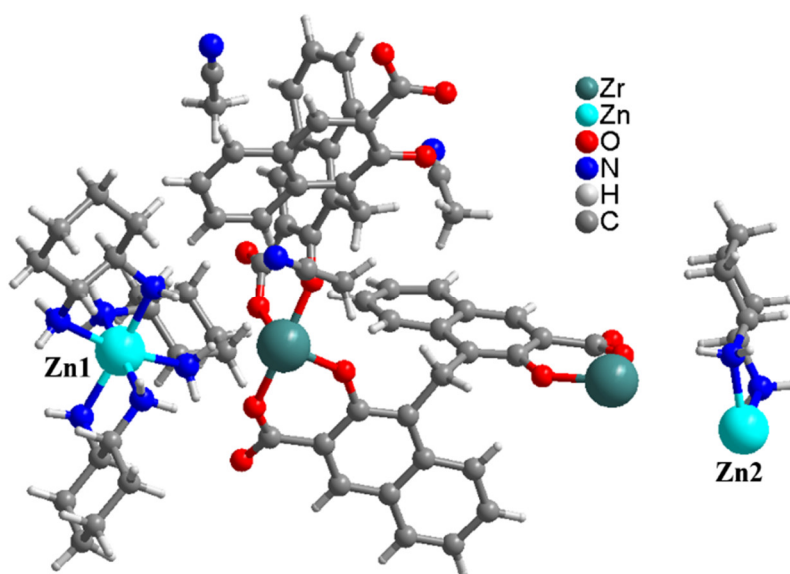

**Figure S3.** The asymmetric unit of PTC-356, showing one third of  $Zr_4L_6$  cage, one and one third of  $[Zn(trans-DCH)_3]^{2+}$  cations, and some solvent molecules. (Other solvents could not be located because of highly disorder).

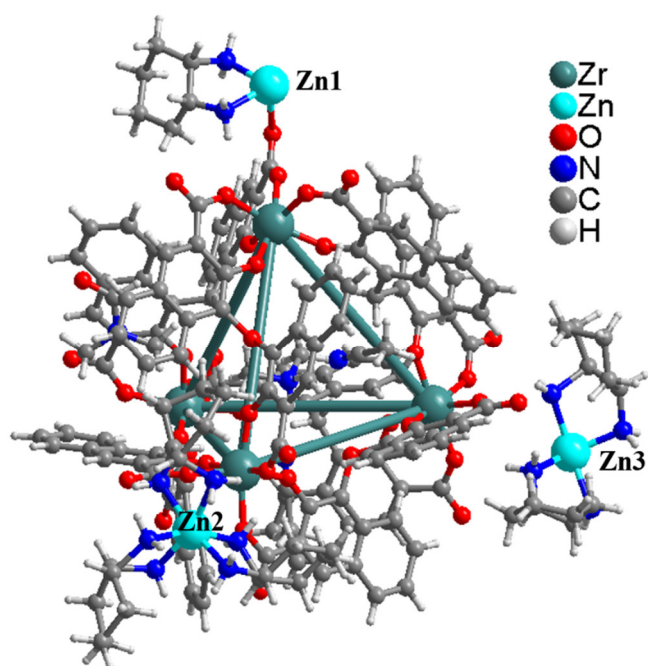

**Figure S4.** The asymmetric unit of **PTC-357**, showing one  $\text{Zr}_4\text{L}_6$  cage, half of  $[\text{Zn}(\text{cis-DCH})_2]^{2+}$  and two  $[\text{Zn}(\text{cis-DCH})_3]^{2+}$  cations, one  $(\text{Me}_2\text{NH}_2)^+$  cation and some solvent molecules. (Some *cis*-DCH and other solvents could not be located because of highly disorder).

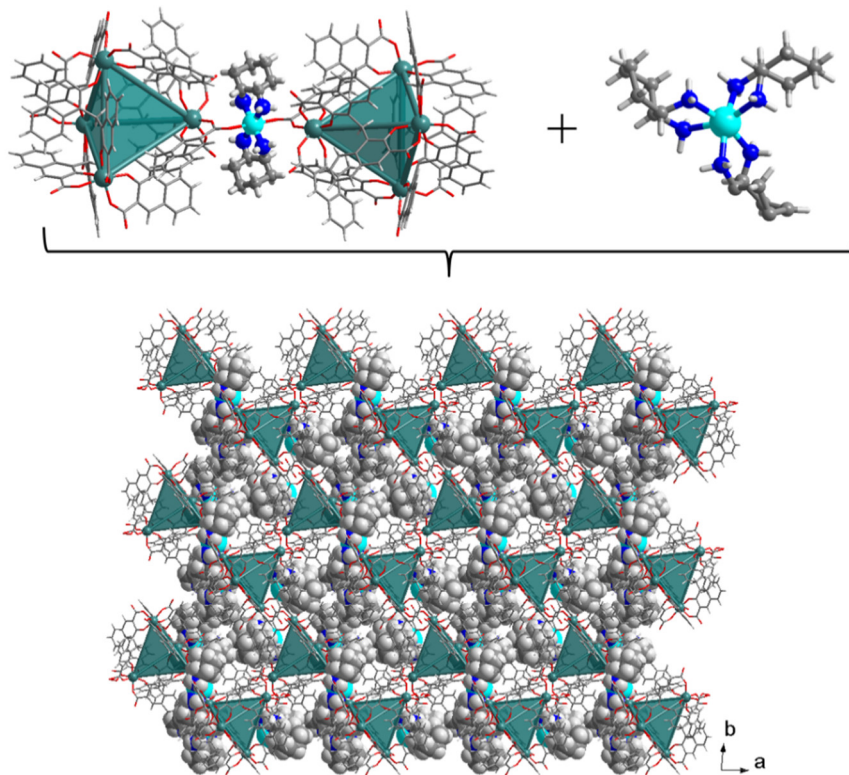

**Figure S5.** The packed structure of **PTC-357**.

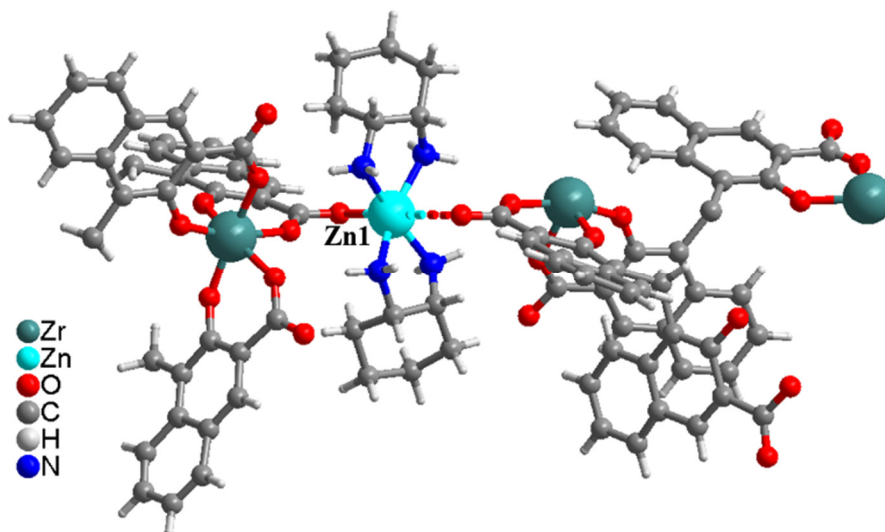

**Figure S6.** The asymmetric unit of **PTC-358**, showing 5/6  $\text{Zr}_4\text{L}_6$  cage and one  $[\text{Zn}(\text{cis-DCH})_2]^{2+}$  cation. ( $(\text{Me}_2\text{NH}_2)^+$  cations and solvents could not be located because of highly disorder).

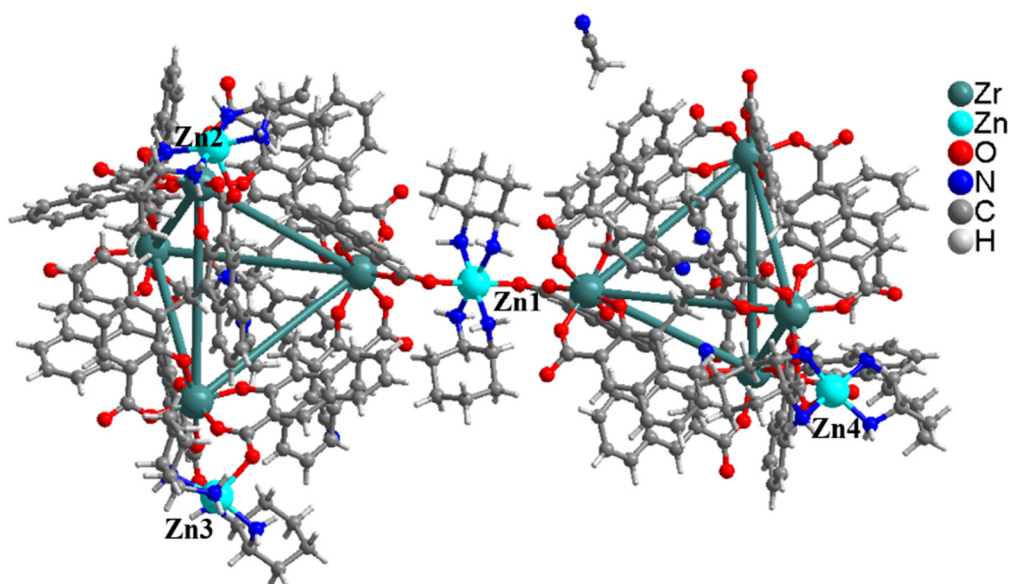

**Figure S7.** The asymmetric unit of **PTC-359**, showing two  $\text{Zr}_4\text{L}_6$  cages, four  $[\text{Zn}(\text{cis-DCH})_2]^{2+}$  cations, one  $(\text{Me}_2\text{NH}_2)^+$  cation and some solvent molecules. (Other cations and solvents could not be located because of highly disorder).

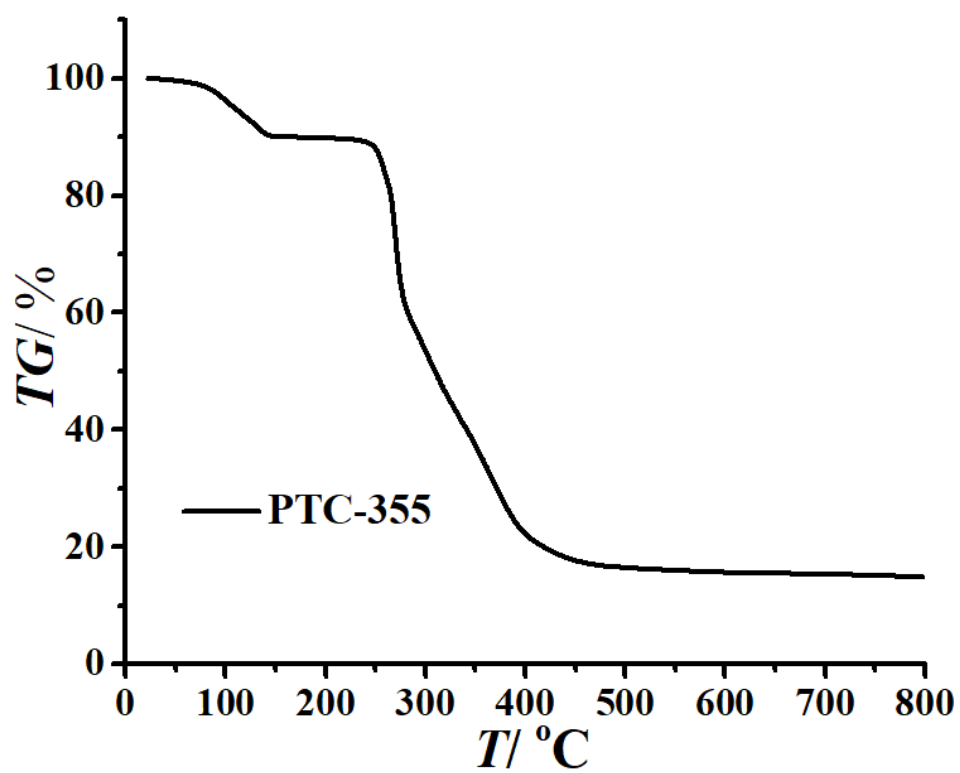

Figure S8. TGA curve of PTC-355.

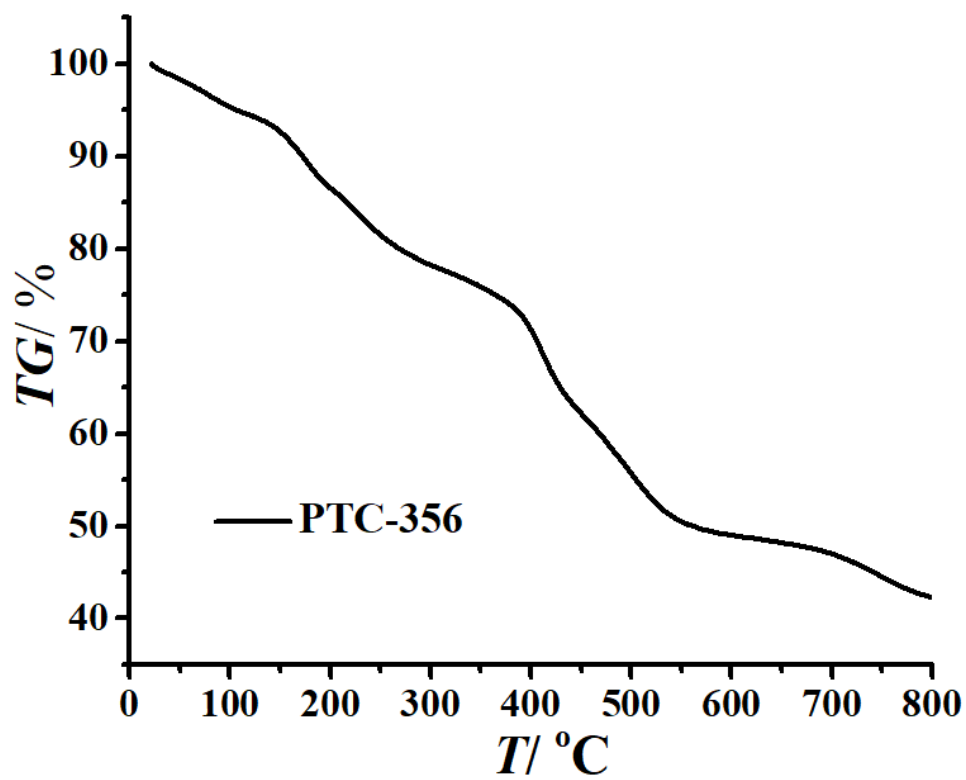

Figure S9. TGA curve of PTC-356.

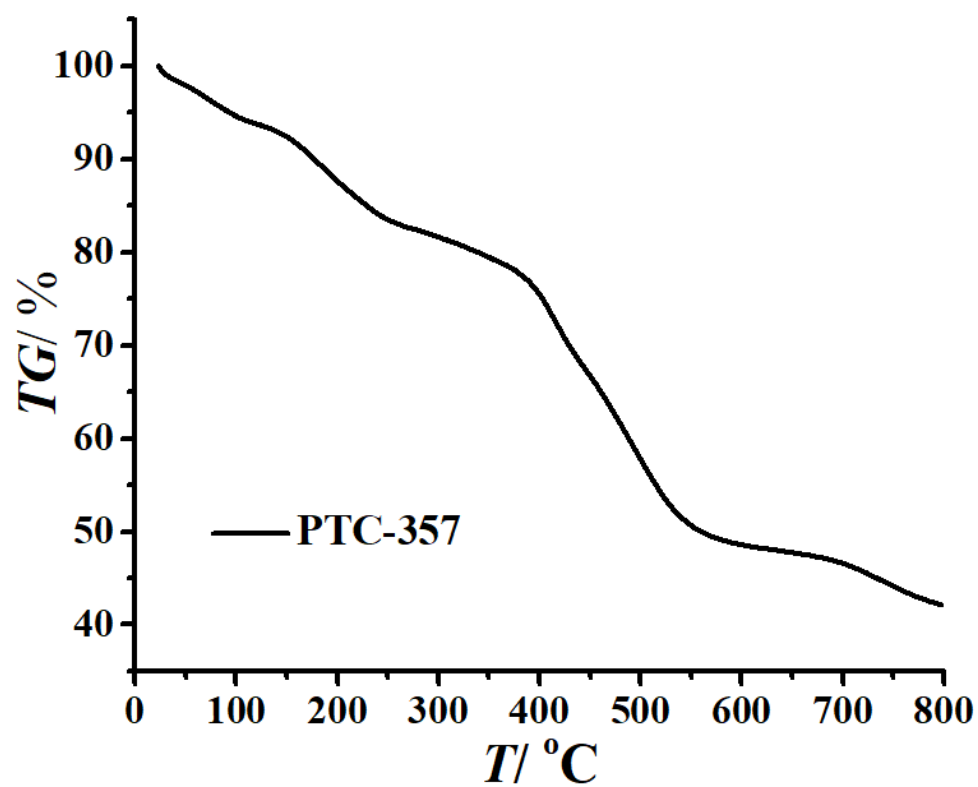

Figure S10. TGA curve of PTC-357.

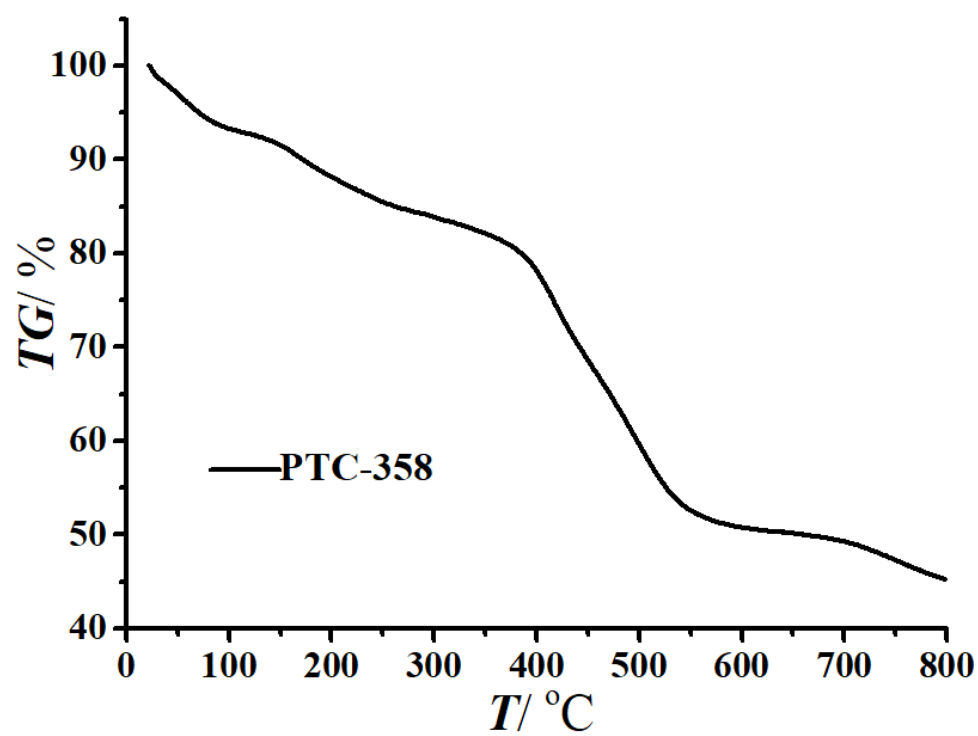

Figure S11. TGA curve of PTC-358.

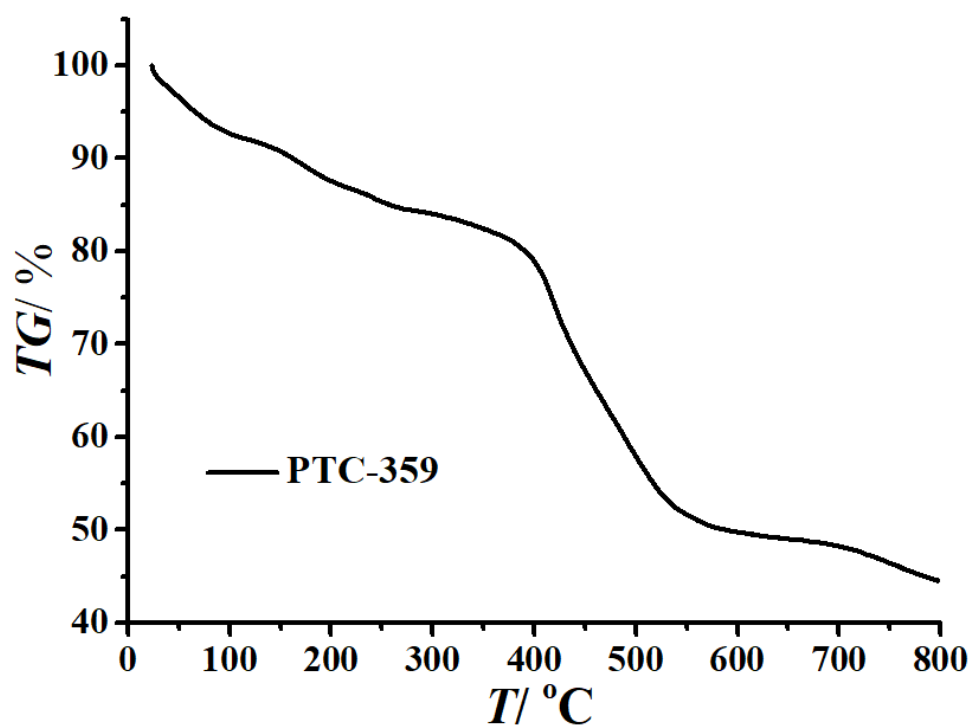

**Figure S12.** TGA curve of **PTC-359**.

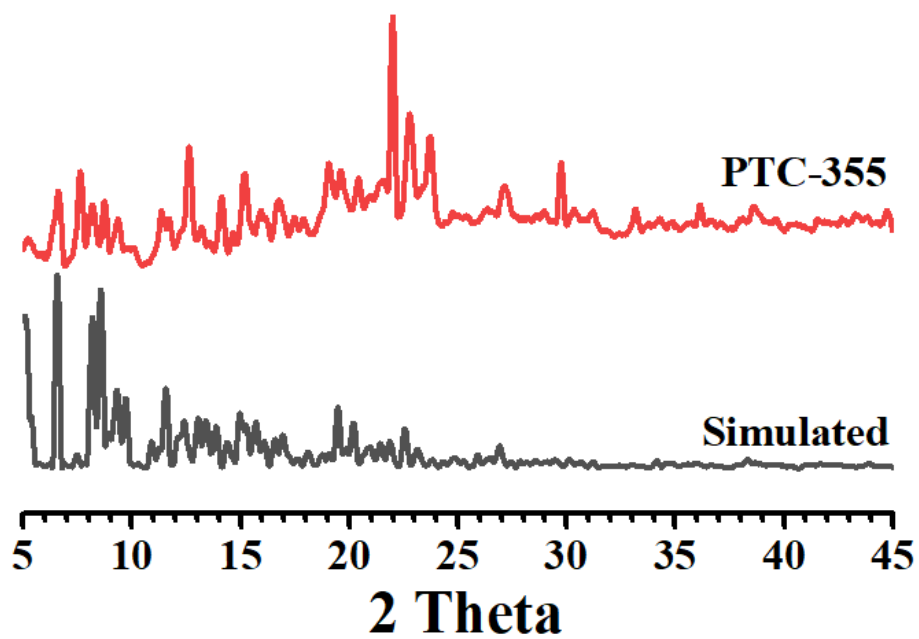

**Figure S13.** PXRD patterns of simulated from the single-crystal data of **PTC-355**(black) and as-synthesized **PTC-355** (red).



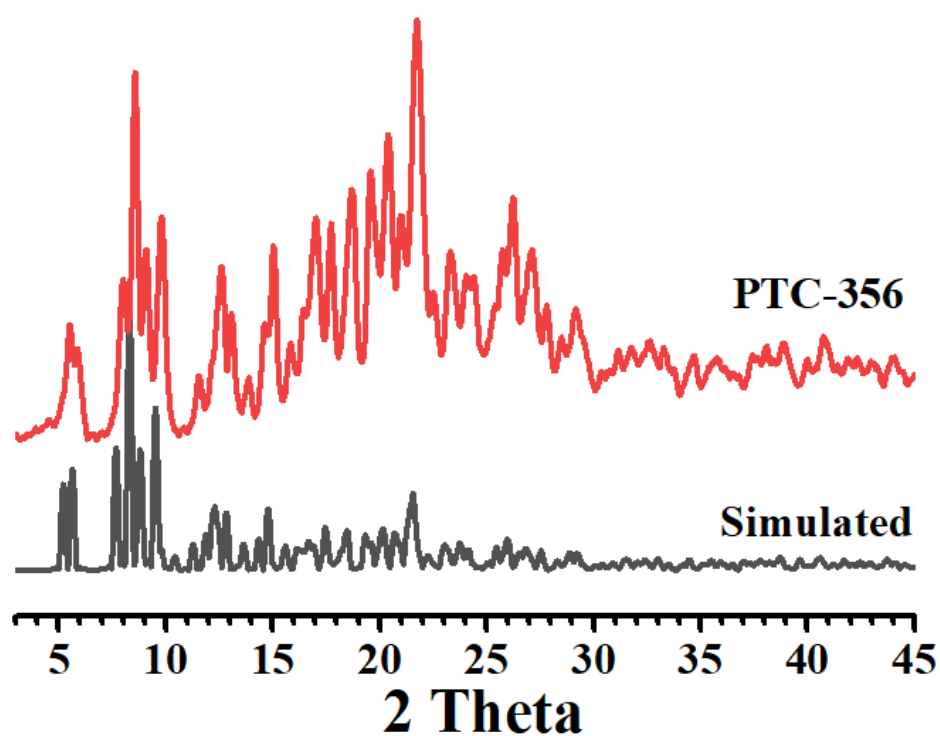

**Figure S14.** PXRD patterns of simulated from the single-crystal data of **PTC-356** (black) and as-synthesized **PTC-356** (red).

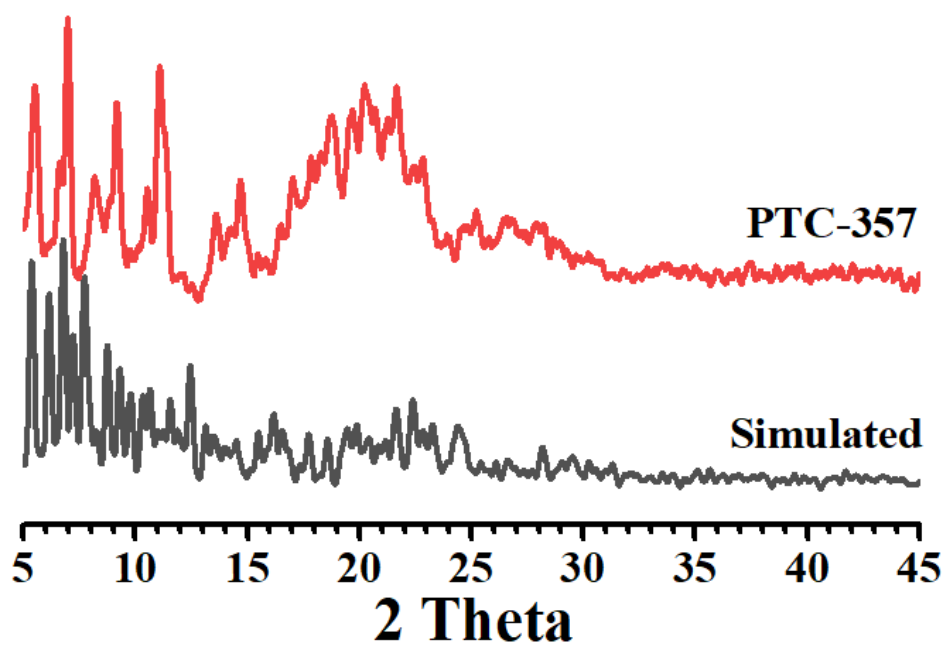

**Figure S15.** PXRD patterns of simulated from the single-crystal data of **PTC-357** (black) and as-synthesized **PTC-357** (red).



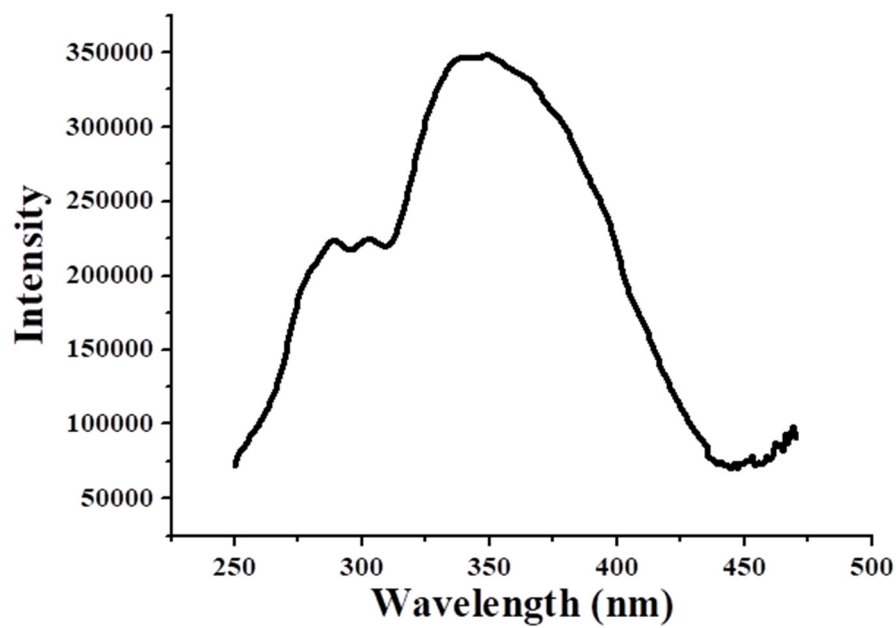

**Figure S16.** The excitation spectrum of L (embonate) ligand.

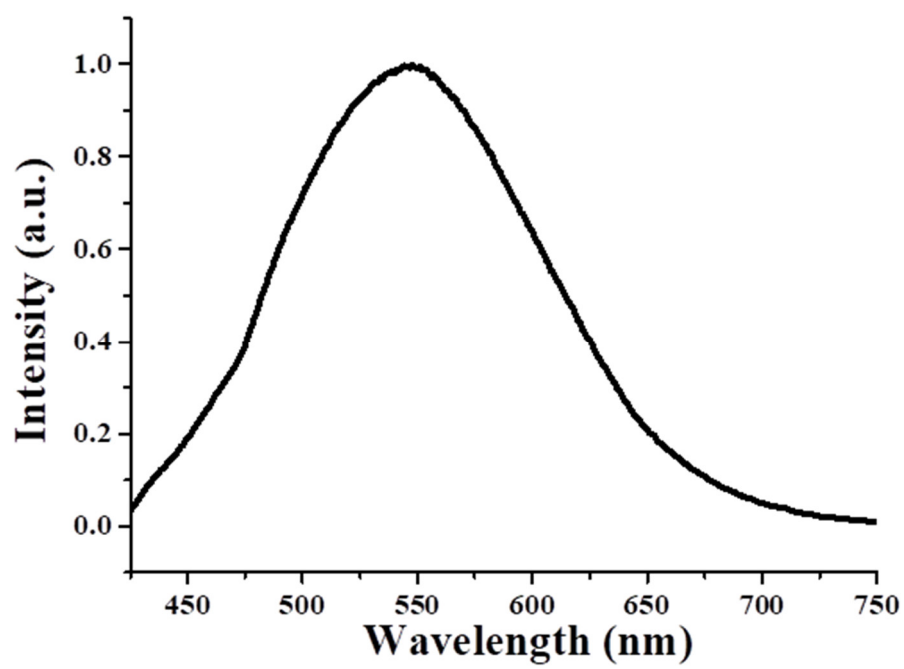

**Figure S17.** The emission spectrum of L (embonate) ligand.

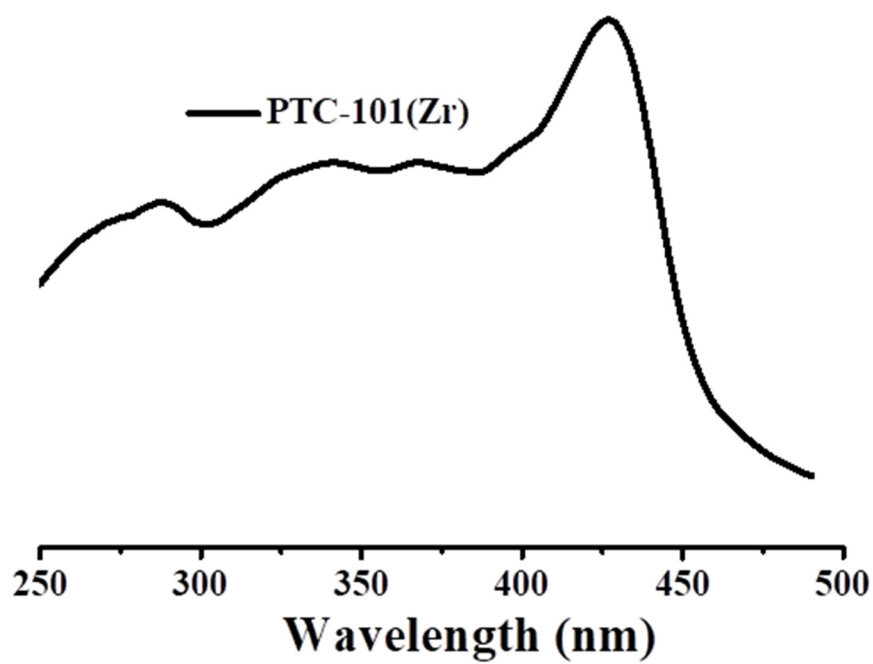

**Figure S18.** The excitation spectrum of compound PTC-101(Zr).

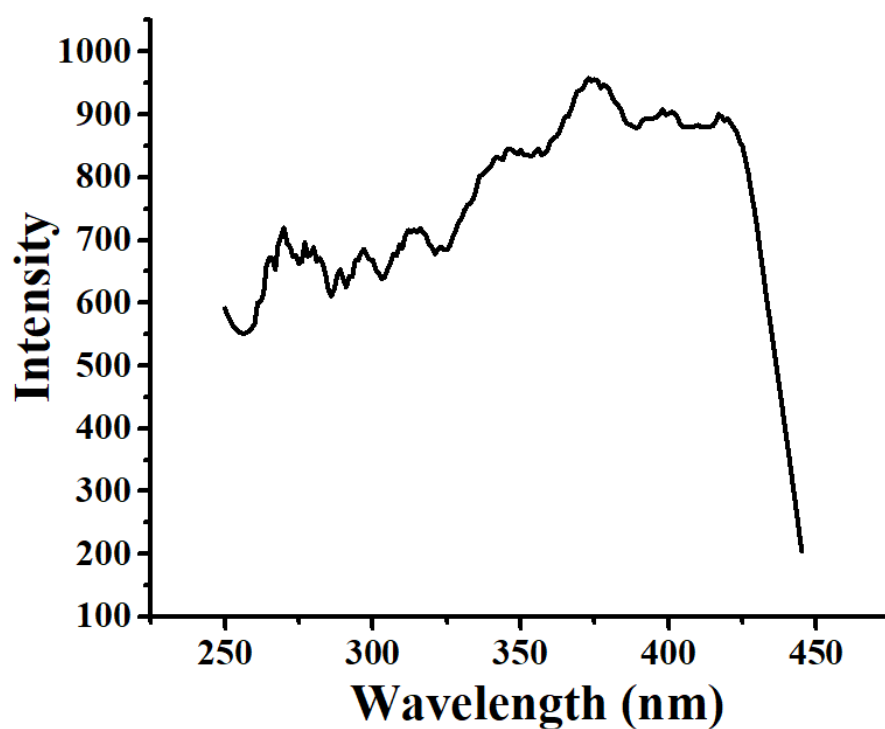

**Figure S19.** The excitation spectrum of PTC-355.

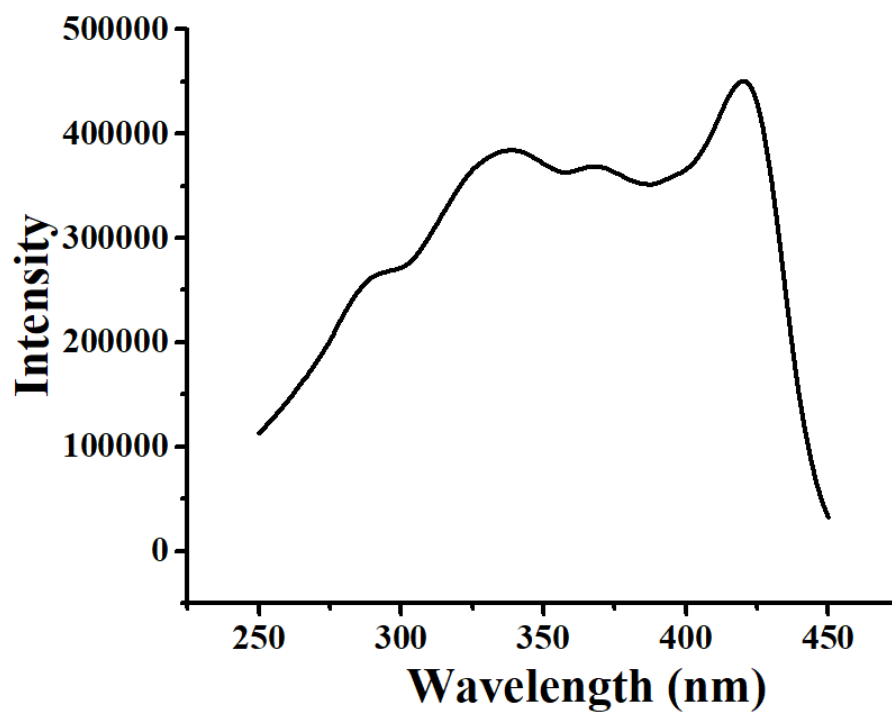

**Figure S20.** The excitation spectrum of PTC-356.

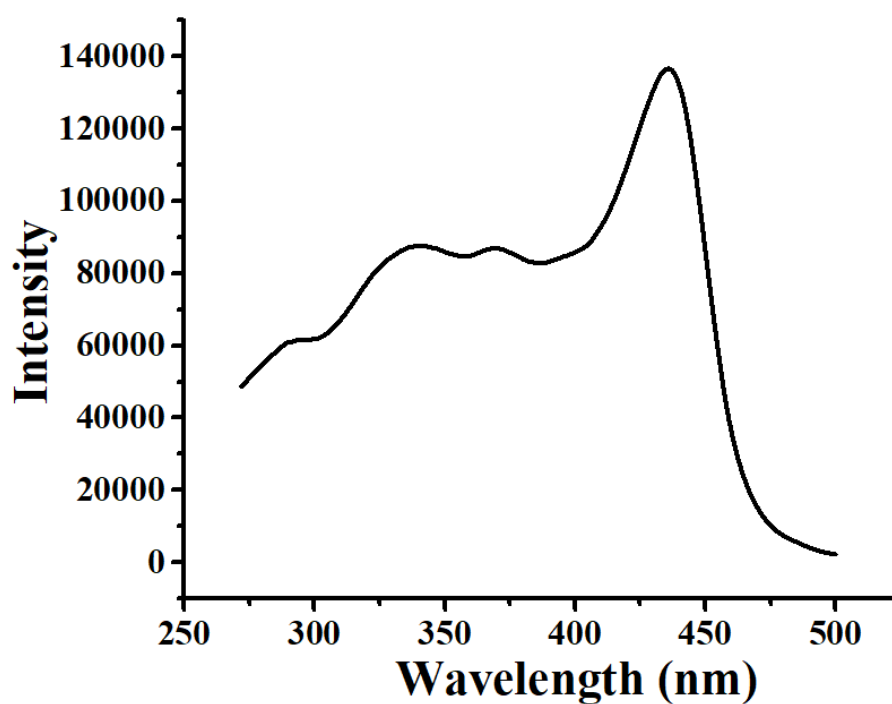

**Figure S21.** The excitation spectrum of PTC-357.

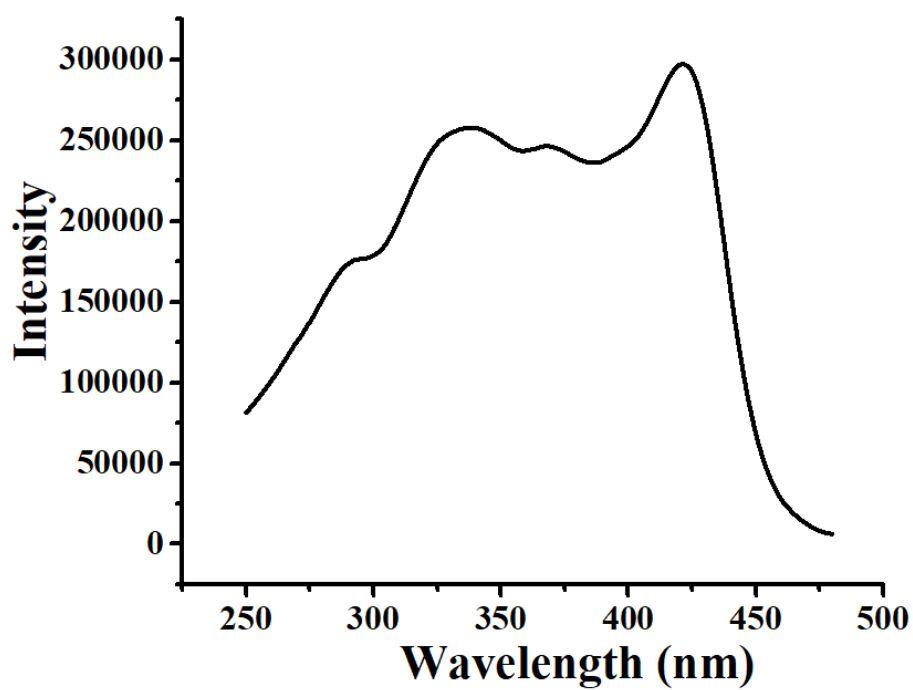

**Figure S22.** The excitation spectrum of PTC-358.

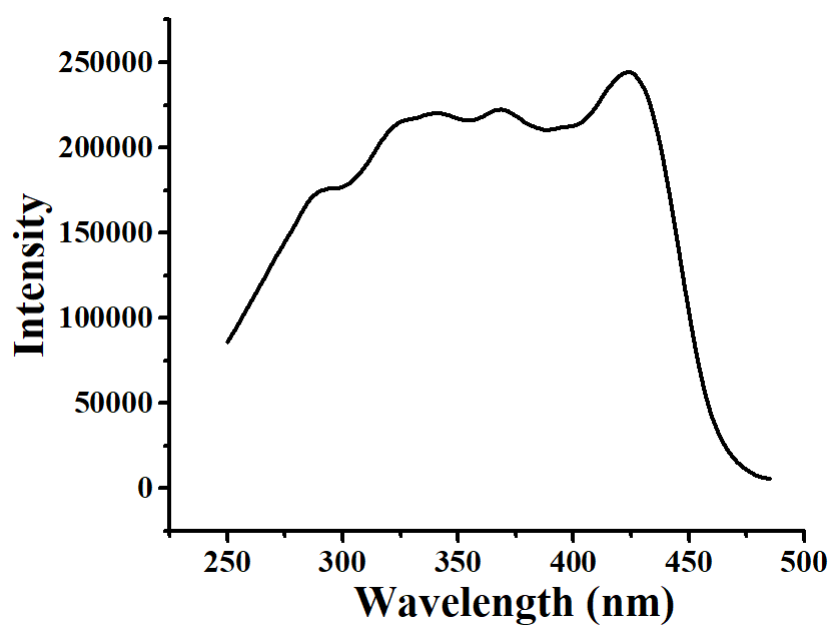

**Figure S23.** The excitation spectrum of PTC-359.

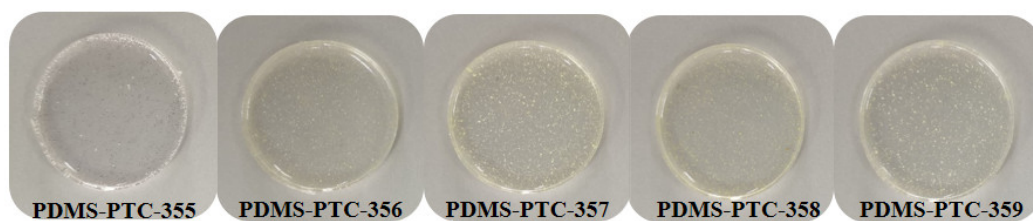

**Figure S24.** The photos of PDMS-PTCs films (PTCs refers to compounds **PTC-355** to **PTC-359**).

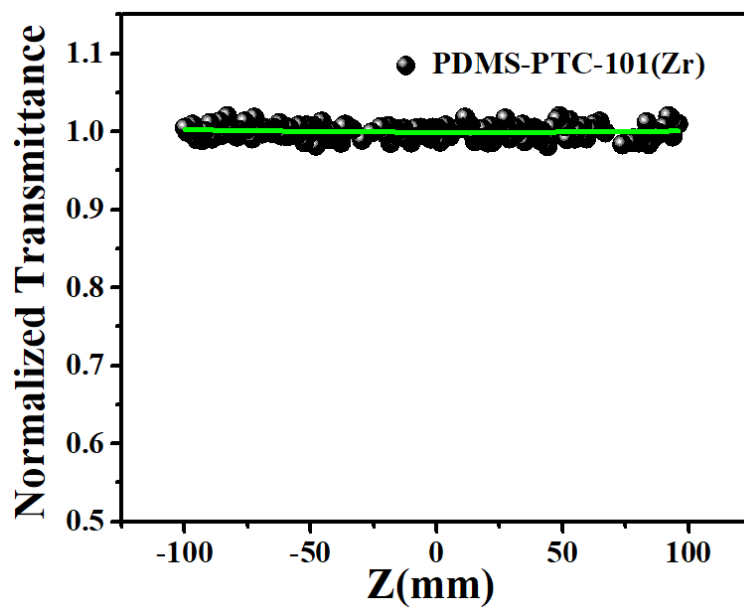

**Figure S25.** OA Z-scan (points) and theoretical fit (solid lines) curve of PDMS-PTC-101(Zr).

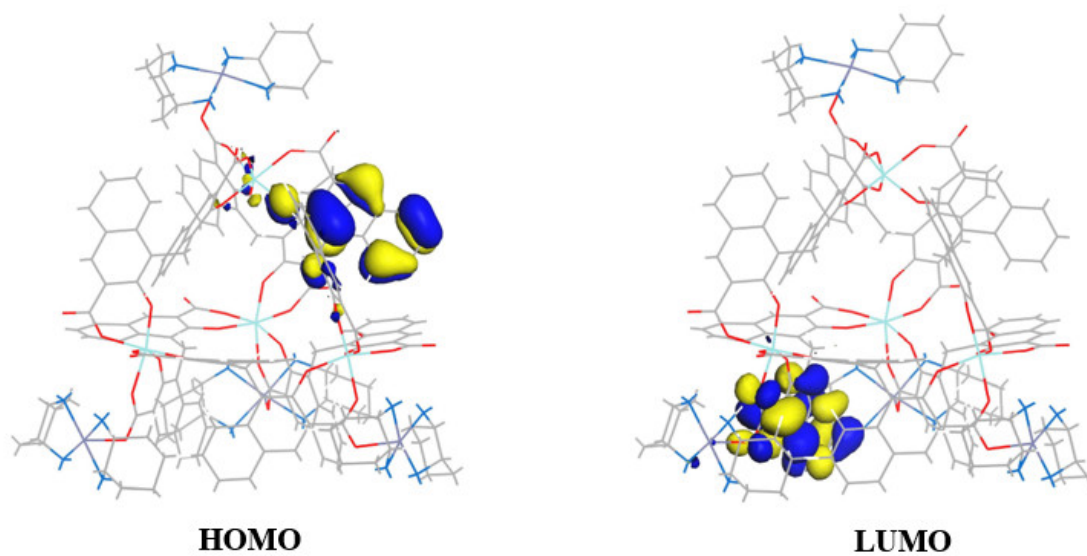

**Figure S26.** The frontier molecular orbitals of **PTC-359**, which was obtained from the DFT calculations.

**Table S1.** Linear and NLO data of PDMS-PTCs films.

| <b>Samples</b>                                        | <b>PDMS-PTC-355</b> | <b>PDMS-PTC-356</b> | <b>PDMS-PTC-357</b> | <b>PDMS-PTC-358</b> | <b>PDMS-PTC-359</b> |
|-------------------------------------------------------|---------------------|---------------------|---------------------|---------------------|---------------------|
| <b>Energy(<math>\mu</math>J)</b>                      | 80                  | 80                  | 80                  | 80                  | 80                  |
| <b>Thickness(<math>\mu</math>m)</b>                   | 800                 | 800                 | 800                 | 800                 | 800                 |
| <b>Tmin</b>                                           | 0.82                | 0.79                | 0.70                | 0.64                | 0.62                |
| <b>T<sub>0</sub></b>                                  | 0.80                | 0.78                | 0.49                | 0.78                | 0.87                |
| <b><math>\beta</math> (*<math>10^{-10}</math>m/W)</b> | 2.5                 | 3.2                 | 6.5                 | 7.6                 | 7.8                 |

Energy: Energy passing through the film, Thickness: thickness of film, Tmin: the minimum normalized transmission; T<sub>0</sub>: linear transmittance;  $\beta$ : nonlinear coefficient.
